# Supplementary material for: Novel FXa Inhibitor Identification through Integration of Ligand- and Structure-Based Approaches
Source: MDPI journal article supplement (doi:10.3390/molecules22101588), 2017-09-22
Supplement: s1 [file s1]

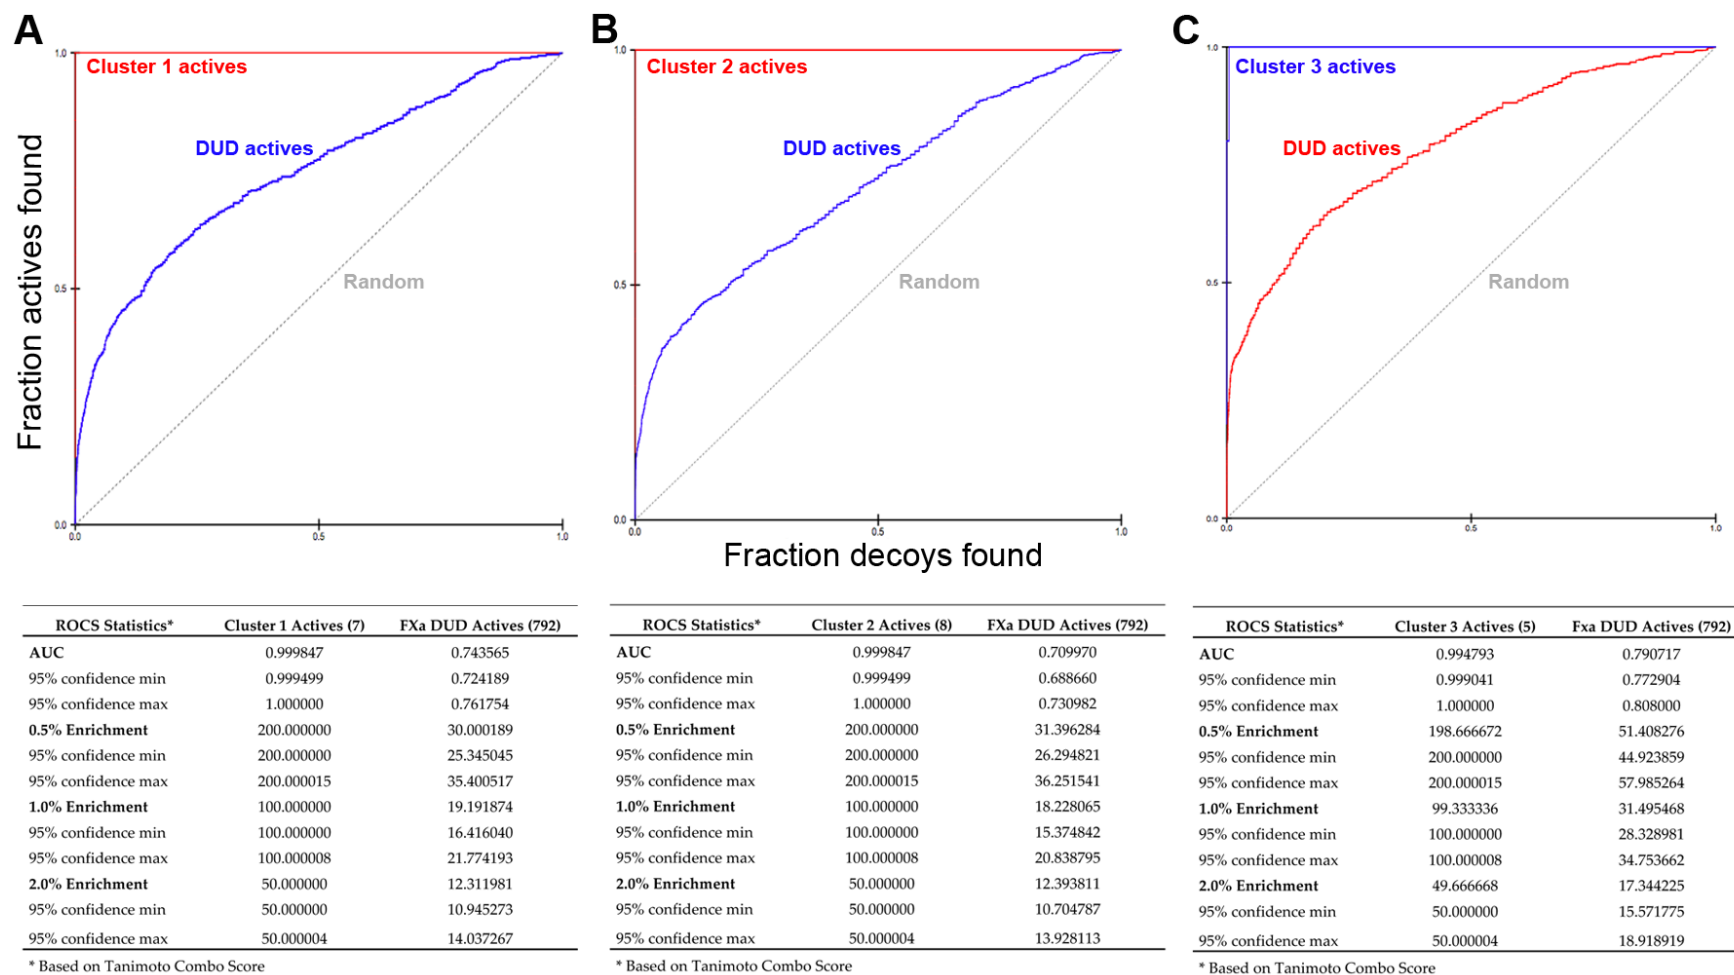

**Supplementary Figure 1.** ROCS shape-based query validation statistics for Cluster 1 (A), Cluster 2 (B) and Cluster 3 (C), using the active molecules for each cluster or all available FXa ligand from the DUD-E database
