# Supplementary material for: Novel FXa Inhibitor Identification through Integration of Ligand- and Structure-Based Approaches
Source: MDPI journal article supplement (doi:10.3390/molecules22101588), 2017-09-22
Supplement: s1 [file s1]

| Number | Cluster | Structure                                                                           | NSC Code | FXa Activity Inhibition >50% at 10µM | FXa Activity Inhibition >50% at 1µM | LigScore1 | LigScore2 | PLP1   | PLP2   | Jain | PMF   | PMF04  | ChemGauss4 Score | ΔG Ludi1 (kcal/mol) | ΔG Ludi2 (kcal/mol) | ΔG Ludi3 (kcal/mol) | Consensus Score | EON ET Combo | EON Rank | ROCS Tanimoto Combo | ROCS Rank |
|--------|---------|-------------------------------------------------------------------------------------|----------|--------------------------------------|-------------------------------------|-----------|-----------|--------|--------|------|-------|--------|------------------|---------------------|---------------------|---------------------|-----------------|--------------|----------|---------------------|-----------|
| 1      | 2       | 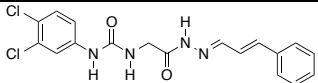   | 216794   | (-)                                  | (-)                                 | -7.03     | -13.26    | 119.19 | 118.48 | 4.75 | 48.53 | -16.08 | -12.167          | -11.69              | -8.41               | -10.84              | 7               | 1.220        | 2        | 0.538               | 233       |
| 2      | 3       |    | 647716   | (+)                                  | (-)                                 | 1.03      | 1.47      | 133.69 | 123.69 | 4.39 | 62.01 | 14.64  | -11.325          | -8.45               | -7.02               | -11.06              | 10              | 0.733        | 34       | 0.541               | 202       |
| 3      | 2       |    | 635553   | (+)                                  | (-)                                 | 2.84      | 4.44      | 146.23 | 127.47 | 3.85 | 81.08 | 46.67  | -10.852          | -8.97               | -7.35               | -12.26              | 10              | 0.919        | 234      | 0.541               | 202       |
| 4      | 2       |    | 207837   | (-)                                  | (-)                                 | 2.90      | 3.84      | 104.55 | 101.66 | 3.14 | 67.92 | 32.88  | -10.616          | -8.24               | -6.68               | -9.12               | 8               | 0.941        | 192      | 0.477               | 1531      |
| 5      | 2       |    | 635393   | (+)                                  | (+)                                 | 2.84      | 4.23      | 113.21 | 106.49 | 3.83 | 42.72 | 23.17  | -10.487          | -6.64               | -5.90               | -11.25              | 9               | 1.095        | 27       | 0.632               | 6         |
| 6      | 2       |    | 241430   | (-)                                  | (-)                                 | 4.33      | 5.03      | 111.95 | 103.47 | 3.23 | 34.90 | -8.99  | -10.385          | -8.44               | -7.20               | -8.71               | 7               | 1.052        | 51       | 0.558               | 111       |
| 7      | 1       |   | 141296   | (+)                                  | (-)                                 | 4.56      | 5.40      | 109.77 | 106.95 | 2.65 | 45.78 | 8.76   | -10.025          | -8.10               | -6.90               | -9.42               | 7               | 1.274        | 34       | 0.686               | 117       |
| 8      | 1       |  | 697707   | (-)                                  | (-)                                 | 3.12      | 5.17      | 120.06 | 106.34 | 1.99 | 58.50 | 43.08  | -10.020          | -8.13               | -6.64               | -10.69              | 9               | 1.134        | 97       | 0.579               | 1658      |
| 9      | 1       |  | 634395   | (+)                                  | (-)                                 | 4.43      | 5.68      | 116.17 | 105.32 | 3.91 | 54.32 | 23.76  | -9.972           | -9.38               | -7.43               | -10.12              | 9               | 1.164        | 78       | 0.593               | 1187      |
| 10     | 1       |  | 351149   | (+)                                  | (-)                                 | -25.76    | -40.68    | 102.58 | 99.01  | 3.63 | 64.65 | -22.20 | -9.830           | -8.65               | -7.77               | -10.65              | 7               | 1.289        | 29       | 0.630               | 500       |

|    |   |                                                                                     |        |     |     |       |        |        |        |      |       |       |        |        |       |        |    |       |     |       |      |
|----|---|-------------------------------------------------------------------------------------|--------|-----|-----|-------|--------|--------|--------|------|-------|-------|--------|--------|-------|--------|----|-------|-----|-------|------|
| 11 | 1 | 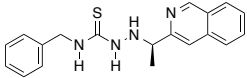   | 362691 | (-) | (-) | 2.67  | 3.61   | 113.60 | 110.89 | 4.51 | 58.49 | 31.38 | -9.759 | -7.35  | -6.49 | -11.84 | 8  | 1.203 | 58  | 0.624 | 579  |
| 12 | 3 |    | 371867 | (+) | (-) | -2.21 | -5.54  | 78.89  | 92.92  | 5.21 | 79.96 | 0.56  | -9.594 | -10.00 | -8.75 | -12.49 | 6  | 0.700 | 72  | 0.463 | 2404 |
| 13 | 1 |    | 697709 | (-) | (-) | 0.15  | -1.26  | 88.92  | 80.25  | 5.07 | 57.36 | 38.36 | -9.475 | -10.06 | -7.87 | -11.03 | 6  | 1.427 | 2   | 0.645 | 332  |
| 14 | 2 |    | 216793 | (-) | (-) | -4.97 | -11.18 | 92.04  | 95.77  | 4.08 | 69.58 | 9.73  | -9.467 | -10.11 | -7.70 | -10.23 | 8  | 1.218 | 3   | 0.476 | 1609 |
| 15 | 2 |    | 618787 | (-) | (-) | 2.30  | 2.09   | 100.67 | 102.17 | 3.19 | 60.28 | 8.92  | -9.299 | -7.12  | -6.01 | -8.30  | 7  | 0.967 | 145 | 0.579 | 55   |
| 16 | 2 |    | 633945 | (-) | (-) | 4.73  | 5.24   | 104.01 | 97.30  | 2.68 | 62.46 | 18.67 | -9.150 | -8.51  | -6.60 | -9.12  | 8  | 1.046 | 54  | 0.463 | 2418 |
| 17 | 2 |   | 624948 | (-) | (-) | 3.91  | 3.55   | 116.05 | 109.66 | 6.17 | 45.45 | 0.76  | -9.135 | -10.49 | -8.26 | -10.58 | 10 | 1.133 | 12  | 0.479 | 1425 |
| 18 | 1 |  | 634412 | (-) | (-) | 2.72  | 2.88   | 111.52 | 109.32 | 3.55 | 58.97 | 28.07 | -9.110 | -9.75  | -7.90 | -10.45 | 9  | 1.176 | 71  | 0.598 | 1091 |
| 19 | 2 |  | 635550 | (+) | (-) | -2.41 | -4.70  | 101.24 | 96.70  | 3.48 | 83.02 | -8.18 | -8.880 | -9.14  | -7.58 | -12.41 | 7  | 0.895 | 284 | 0.567 | 76   |

|    |   |                                                                                     |        |     |     |        |        |        |        |      |       |        |        |        |       |        |    |       |     |       |      |
|----|---|-------------------------------------------------------------------------------------|--------|-----|-----|--------|--------|--------|--------|------|-------|--------|--------|--------|-------|--------|----|-------|-----|-------|------|
| 20 | 2 | 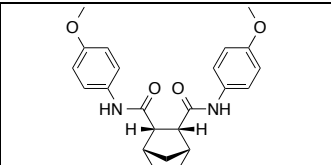   | 241421 | (-) | (-) | 3.26   | 3.41   | 125.49 | 120.52 | 5.59 | 51.88 | 4.02   | -8.829 | -9.30  | -7.32 | -9.80  | 10 | 1.098 | 24  | 0.630 | 7    |
| 21 | 1 |    | 353896 | (-) | (-) | -3.36  | -5.93  | 108.69 | 107.10 | 3.93 | 74.56 | 24.73  | -8.790 | -8.78  | -7.06 | -11.20 | 8  | 1.341 | 12  | 0.576 | 1800 |
| 22 | 2 |    | 634416 | (+) | (-) | -7.74  | -12.77 | 110.25 | 110.45 | 2.12 | 56.81 | 12.90  | -8.737 | -8.67  | -7.05 | -9.63  | 7  | 1.026 | 77  | 0.485 | 1180 |
| 23 | 2 |    | 635142 | (+) | (-) | 4.71   | 5.57   | 112.52 | 114.50 | 3.16 | 46.51 | 10.25  | -8.729 | -8.17  | -6.52 | -9.87  | 8  | 0.989 | 112 | 0.481 | 1329 |
| 24 | 2 |    | 646798 | (+) | (-) | -8.92  | -16.56 | 102.96 | 106.48 | 2.61 | 51.77 | 8.02   | -7.480 | -10.46 | -8.33 | -12.00 | 7  | 0.910 | 250 | 0.504 | 617  |
| 25 | 2 |   | 204570 | (-) | (-) | 2.56   | 1.16   | 103.15 | 95.42  | 2.94 | 7.87  | -20.75 | -7.453 | -9.64  | -7.40 | -6.83  | 6  | 0.988 | 114 | 0.541 | 204  |
| 26 | 2 |  | 309892 | (-) | (-) | 2.10   | 2.70   | 97.72  | 98.56  | 3.41 | 44.77 | -1.03  | -7.289 | -9.07  | -7.16 | -11.73 | 8  | 0.959 | 163 | 0.457 | 2976 |
| 27 | 2 |  | 658322 | (-) | (-) | 1.53   | 1.34   | 105.10 | 102.90 | 2.74 | 40.76 | -0.84  | -7.165 | -9.48  | -7.57 | -10.06 | 7  | 0.908 | 255 | 0.468 | 2049 |
| 28 | 1 |  | 716348 | (-) | (-) | -12.18 | -21.74 | 112.86 | 112.60 | 3.36 | 78.42 | 15.68  | -5.123 | -11.96 | -9.08 | -13.54 | 7  | 1.173 | 74  | 0.581 | 1568 |

|    |   |                                                                                   |        |     |     |       |       |       |        |      |       |       |        |        |       |        |   |       |     |       |      |
|----|---|-----------------------------------------------------------------------------------|--------|-----|-----|-------|-------|-------|--------|------|-------|-------|--------|--------|-------|--------|---|-------|-----|-------|------|
| 29 | 2 | 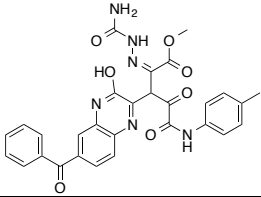 | 649836 | (-) | (-) | -2.74 | -8.38 | 98.40 | 111.21 | 3.48 | 42.17 | -2.04 | -4.725 | -10.72 | -8.51 | -11.32 | 6 | 0.926 | 224 | 0.474 | 1728 |
| 30 | 3 |  | 657360 | (-) | (-) | -0.74 | -2.43 | 70.45 | 71.01  | 3.92 | 78.57 | 44.24 | -3.579 | -8.52  | -6.72 | -11.14 | 7 | 0.704 | 67  | 0.463 | 2380 |
